# Supplementary material for: Electrochemical performance of a Li+-enriched metallohydrogel as an electrolyte and electrode material for supercapacitors
Source: Royal Society of Chemistry journal article supplement (doi:10.1039/d4se00096j), 2024-01-01
Supplement: d4se00096j1.pdf [file d4se00096j1.pdf]

Electronic Supplementary Information

**Electrochemical performance of a Li<sup>+</sup>-enriched metallohydrogel as electrolyte and electrode materials for supercapacitors**

Yeeshu Kumar,<sup>a</sup> Moupia Mukherjee,<sup>a</sup> Manish Kumar Dixit,<sup>a</sup> Abul Kalam<sup>b</sup> and Mrigendra Dubey<sup>\*a</sup>

*<sup>a</sup>Soft Materials Research Laboratory, Department of Metallurgical Engineering and Materials Science, Indian Institute of Technology Indore, Indore 453552, India.*

*Email: [mdubey@iiti.ac.in](mailto:mdubey@iiti.ac.in)*

*<sup>b</sup>Department of Chemistry, College of Science, King Khalid University, Abha 61413, Saudi Arabia.*

---

| <b><u>Table of Contents:</u></b> | <b><u>Pages</u></b> |
|----------------------------------|---------------------|
| <b>EXPERIMENTAL SECTION</b>      |                     |
| Material and physical methods    | S2                  |
| Rheological Study                | S2                  |
| Transport Number Evaluation      | S3                  |
| Electrochemical Characterization | S3                  |
| Synthesis and Characterization   | S4                  |
| Scheme S1                        | S4                  |
| <b>Supplementary Figures</b>     |                     |
| Figure S1                        | S5                  |
| Figure S2                        | S5                  |
| Figure S3                        | S6                  |
| Figure S4                        | S6                  |
| Figure S5                        | S7                  |
| Figure S6                        | S7                  |
| Figure S7                        | S8                  |
| Figure S8                        | S8                  |
| Figure S9                        | S9                  |
| Figure S10                       | S9                  |
| Figure S11                       | S9                  |
| Figure S12                       | S10                 |
| Table S1                         | S10                 |
| Table S2                         | S11                 |

## EXPERIMENTAL SECTION

### Materials and Physical Methods:

Common reagents and solvents used in the current work were procured from Advent chembio Pvt. Ltd, Navi Mumbai India and Finar Ltd, Ahmedabad, India. Lithium hydroxide and 5-aminosalicylic acid were purchased from Spectrochem Pvt. Ltd., Mumbai (India). Cobalt(II) acetate tetrahydrate was procured from Sisco Research Laboratories Pvt. Ltd. Mumbai (India). Hexamethylene tetramine, trifluoroacetic acid, Phloroglucinol were purchased from Sigma-Aldrich.

Fourier transform infrared (FT-IR) spectra were recorded by using spectrum two FT-IR spectrometer (PerkinElmer). PerkinElmer's Lambda 365 spectrophotometer was used to carry out UV-Vis absorption study.  $^1\text{H}$  and  $^{13}\text{C}$  NMR spectra was recorded on a AVNACE NEO500 Ascend Bruker BioSpin International AG, Switzerland. Electrospray ionization mass spectra were obtained by using LC-MS Q-ToF. Field emission scanning electron microscopic (FESEM) images were obtained using a JOEL-7610F Plus microscope. Powder X-ray diffraction (PXRD) data were collected within the  $2\theta$  range of 10 to  $70^\circ$  using an Empyrean instrument from Malvern Panalytical. Thermal gravimetric analysis (TGA) experiments were conducted on a STA 8000 thermal analyzer from PerkinElmer, ramping the temperature from 30 to  $700^\circ\text{C}$  at a rate of  $10^\circ\text{C}$  per minute.

### Rheological Study:

As synthesized metallohydrogels (1% w/v) samples were subjected to rheological experiments with the help of an Anton Paar's rotary rheometer MCR 102. The samples were placed in between two stainless steel parallel plates with diameter 20 mm and maintaining 1.0 mm gap. Dynamic amplitude sweep measurements were carried out to the linear viscoelastic regions (LVR) of the metallohydrogels (**MG-Co**) by recording the storage and loss moduli ( $G'$ ,  $G''$ ) against applied stress and strain, respectively at constant frequency of 10 rad/sec. Dynamic oscillatory frequency sweep measurements were conducted at room temperature ( $25^\circ\text{C}$ ) within the range of 0.1 to 100 rad/sec at a constant shear strain of 1%.

### Transport number evaluation

Lithium-ion transport number ( $t_{\text{Li}^+}$ ) were determined for freshly synthesized metallohydrogels (**MG-Co**) through the utilization of d.c. polarization and electrochemical impedance spectroscopic methods. In this process, a voltage step of 0.75 volts was applied to the electrochemical cell setup, denoted as SS|**MG-Co**|SS, to induce polarization. The resulting current output was recorded over time, as depicted in Figure 9. The calculation of lithium-ion transport number ( $t_{\text{Li}^+}$ ) was carried out using a standard equation:

$$t_{\text{Li}^+} = \frac{I_s(\Delta V - I_0 R_0)}{I_0(\Delta V - I_s R_s)} \dots \dots \dots (2)$$

Where,  $I_0$  and  $I_s$  represent the initial current and steady-state current, respectively, both obtained from the dc polarization measurements.  $R_0$  signifies the cell resistance before the polarization experiment, while  $R_s$  represents the cell resistance after the polarization experiment. It's worth noting that the values of  $R_0$  and  $R_s$

were extracted from Nyquist plot measurements. Lastly,  $\Delta V$  denotes the applied step voltage.

### Electrochemical Characterization:

The working electrodes were prepared using the **MG-Co** xerogel as active materials which was mixed with activated carbon and polyvinylidene fluoride (PVDF) in a mass ratio 75:20:5. Further, obtained mixture was dispersed in N-Methyl-2-Pyrrolidone (NMP). The resulting slurry was spread onto the nickel foam (12 mm diameter) and then dried under vacuum at 70 °C for 8 h. Further, the coated nickel foam was pressed using palletizer. Moreover, **MG-Co-Li** gel and 1M LiOH were used as electrolyte in the three-electrode system. The mass of the active material was in the range of 1.5–2.5 mg. All the electrochemical measurements were carried out on a CHI 608E electrochemical workstation (CH Instruments) with a three-electrode configuration, where Pt wire was used as the counter electrode and an Ag/AgCl as the reference electrode under normal atmospheric conditions. Cyclic voltammetry (CV) was carried out from –0.6 to 0.6 V potential window at various scan rates of 10–100 mV/s. Galvanostatic charge–discharge (GCD) curves were conducted in the potential range of –0.85 to 0.5 V at different constant current density. Electrochemical impedance spectroscopic (EIS) measurements were carried out in a frequency range of 0.1 Hz to 1 MHz at open-circuit potential with an ac perturbation of 10 mV.

### Synthesis and characterization:

#### Synthesis of 2,4,6-trihydroxybenzene-1,3,5-tricarbaldehyde

10 g (71.5 mmol) of Hexamethylene tetramine (HMTA) were dissolved in 40 ml of trifluoroacetic acid (TFA) and slowly added drop by drop to a suspension of phloroglucinol (3.98 g or 31.5 mmol) in TFA (20 mL). The resulting mixture was then subjected to reflux for a period of 5 hours. Subsequently, 150 mL of 3M hydrochloric acid (HCl) were introduced into the resulting orange solution, and the mixture was kept under reflux for an additional 2 hours. The resultant solution was extracted three times using 150 mL of dichloromethane (DCM) and then dried using anhydrous magnesium sulfate ( $\text{MgSO}_4$ ). After filtration, the solution was vacuum-dried to yield a fine powder with a yellowish-orange colour. Yield 1.4 g (16%).  $^1\text{H}$  NMR ( $d_6$ -DMSO, 400 MHz,  $\delta_{\text{H}}$ , ppm) 14.04 (s, 3H, -OH), 10.08 (s, 3H, -CHO).

#### Synthesis of **H<sub>9</sub>SAL** gelator molecule

2,4,6-trihydroxybenzene-1,3,5-tricarbaldehyde (0.1 g, 0.475 mmol) dissolved in methanol was added dropwise to a methanolic solution of 5-aminosalicylic acid (0.218 g, 1.423 mmol) and the obtained suspension was kept on reflux for 8 hours at 65 °C. It afforded brown colored solid compound, this compound was filtered, washed with methanol, diethyl ether followed by vacuum drying. Yield 0.270 g (80%). Anal. calcd. for  $\text{C}_{30}\text{H}_{21}\text{N}_3\text{O}_{12}$ : C, 58.54; H, 3.44; N, 6.83; Found: C, 58.33; H, 3.20; N, 6.63.  $^1\text{H}$  NMR ( $d_6$ -DMSO, 500 MHz,  $\delta_{\text{H}}$ , ppm) 6.83 (s, 3H, Ar-H), 7.37 (s, 3H, Ar-H), 7.80 (s, 3H, Ar-H), 8.65 (s, 3H, -HC=N).  $^{13}\text{C}$  NMR ( $d_6$ -DMSO, 500 MHz,  $\delta$ , ppm) 105.28, 119.32, 123.67, 129.58, 149.76, 162.32, 173.40, 184.75, 207.12. FT-IR (ATR,  $\text{cm}^{-1}$ ):  $\nu$ (-OH) 2876, 3043,  $\nu$ (-C=O) 1607, 1673. ESI-MS  $m/z$ : [ $\text{C}_{30}\text{H}_{13}\text{N}_3\text{O}_{12}.\text{Li}_8.\text{H}_2\text{O}$ ] $^+$ , 681.16 (calcd. 681.18). The **H<sub>9</sub>SAL** was deprotonated with LiOH for NMR characterization due to insolubility of **H<sub>9</sub>SAL** in DMSO solvent.

#### Synthesis of **MG-Co** metallohydrogel

**H<sub>9</sub>SAL** (20 mg, 0.032 mmol) was first dissolved in 0.5 mL of deionized water in a vial. Subsequently, it was deprotonated using LiOH.H<sub>2</sub>O (12.28 mg, 0.28 mmol) and then subjected to sonication. This process

led to the formation of a dark red transparent solution. To this solution, a freshly prepared solution of  $\text{Co}(\text{OAc})_2 \cdot 4\text{H}_2\text{O}$  (13 mg, 0.048 mmol) in 0.5 mL of deionized water was added drop by drop. Over time, the solution gradually transformed into a dark red-colored gel, which we refer to as **MG-Co**. To confirm the formation of the gel, we employed the inverted vial test method. Anal. calcd. for  $\text{C}_{30}\text{H}_{13}\text{N}_3\text{O}_{12}\text{Co}_2\text{Li}_3 \cdot (\text{H}_2\text{O})_6$ : C, 39.43; H, 2.75; N, 4.60; Found: C, 39.38; H, 2.68; N, 4.56. FT-IR (ATR,  $\text{cm}^{-1}$ ):  $\nu(-\text{OH})$  3290,  $\nu(-\text{C}=\text{O})$  1555, 1611. ESI-MS (diluted gel)  $m/z$ :  $[\text{C}_{30}\text{H}_{17}\text{N}_3\text{O}_{12}\text{Co} \cdot \text{H}_2\text{O} \cdot \text{Li}_2 + \text{H}]^+$ , 703.05 (*calcd.* 703.06),  $[(\text{C}_{30}\text{H}_{13}\text{N}_3\text{O}_{12})\text{Co}_2 \cdot \text{H}_2\text{O} \cdot \text{Li}_2 + \text{H}]^+$ , 771.91 (*calcd.* 771.99) and  $[(\text{C}_{30}\text{H}_{13}\text{N}_3\text{O}_{12})\text{Co}_3 \cdot (\text{H}_2\text{O})_6 \cdot \text{Li}_2 + \text{H}]^+$ , 906.94 (*calcd.* 906.95).

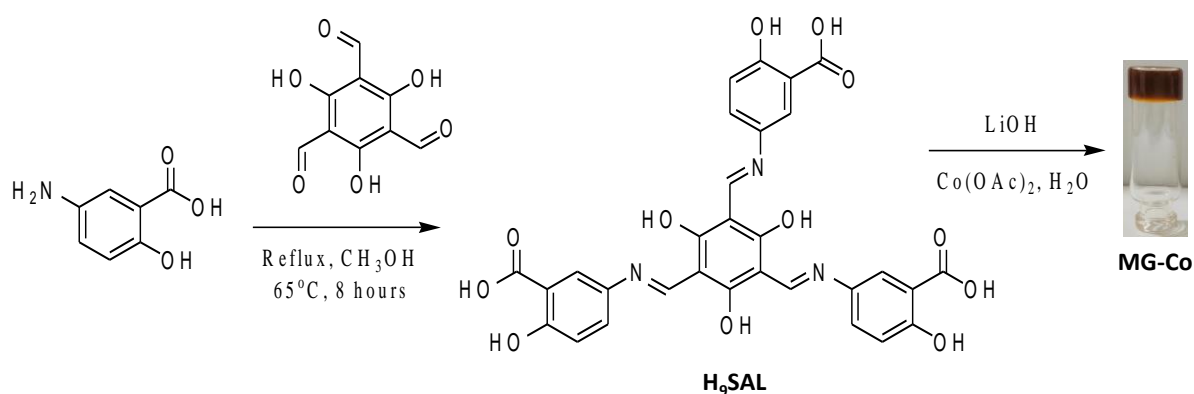

**Scheme S1:** Synthetic route adapted for the synthesis of **H<sub>9</sub>SAL** and **MG-Co**.

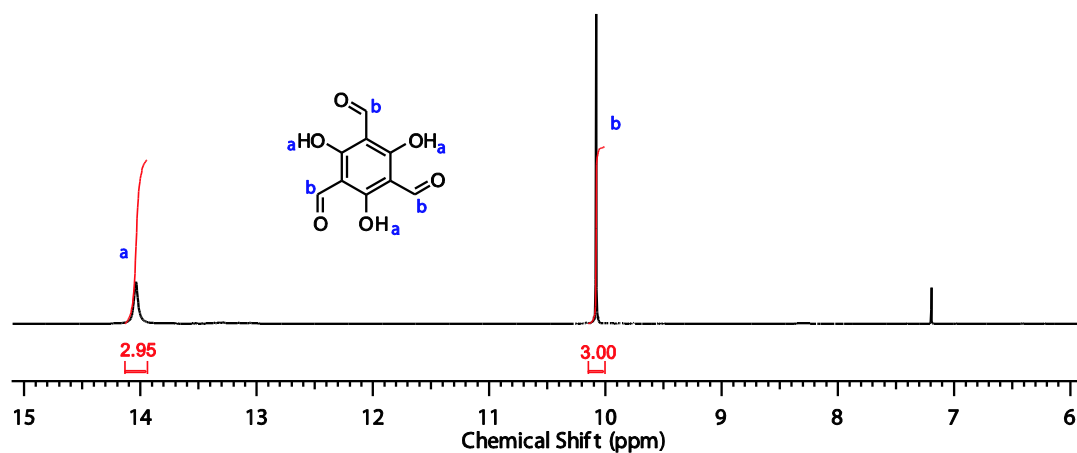

**Figure S1.**  $^1\text{H}$  NMR spectrum of 2,4,6-trihydroxybenzene-1,3,5-tricarbaldehyde.

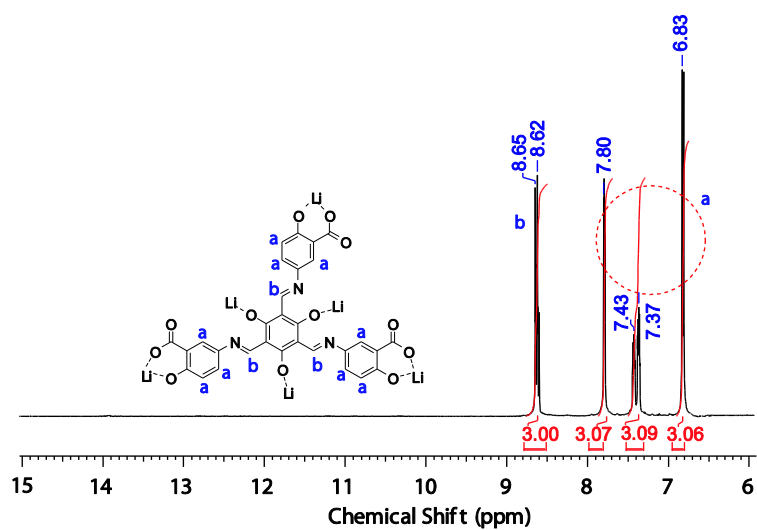

Figure S2.  $^1\text{H}$  NMR spectrum of LiOH deprotonated  $\text{H}_9\text{SAL}$  ( $\text{DMSO-}d_6$ , 500 MHz)

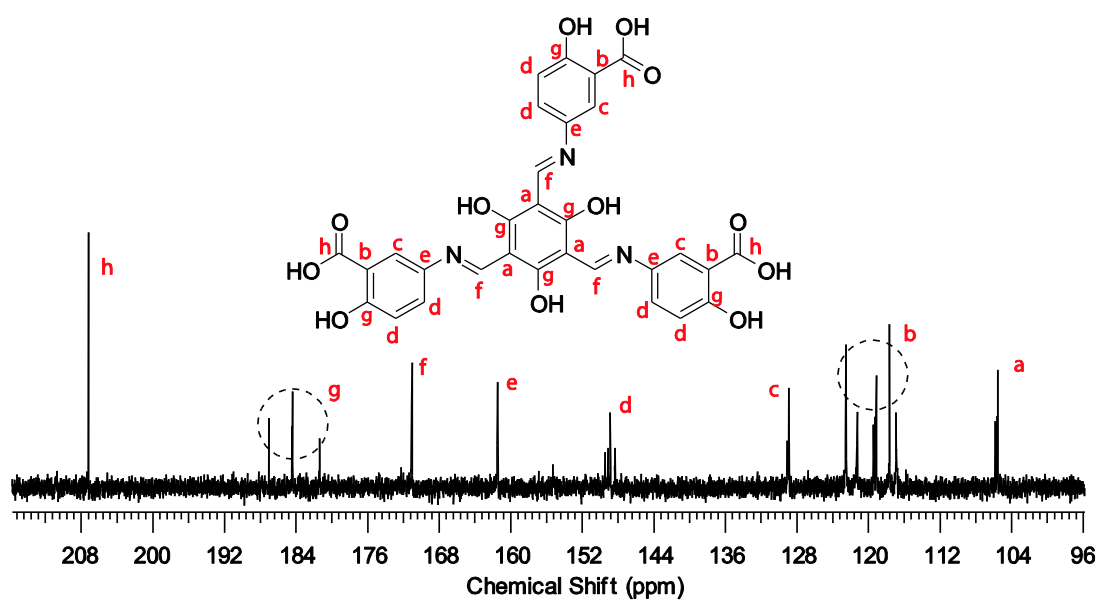

Figure S3.  $^{13}\text{C}$  NMR spectrum of LiOH deprotonated  $\text{H}_9\text{SAL}$  ( $\text{DMSO-}d_6$ , 500 MHz).

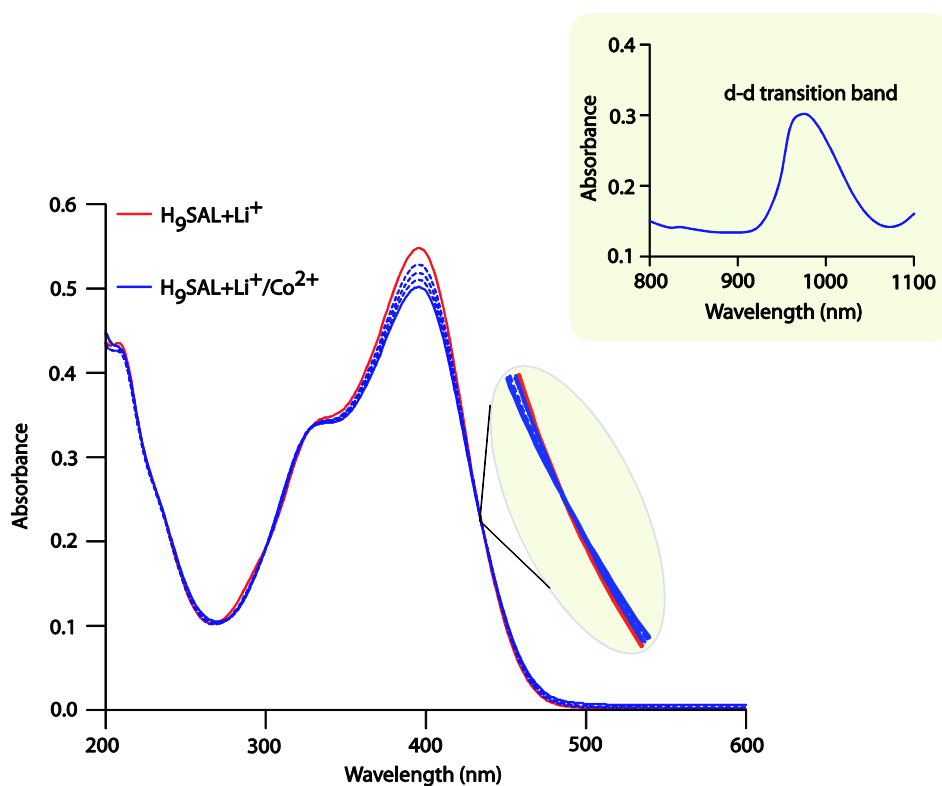

**Figure S4.** (A) UV-vis titration spectra of  $\text{H}_9\text{SAL}+\text{Li}^+$  ( $1 \times 10^{-5}$  M,  $\text{H}_2\text{O}$ , red line) vs  $\text{Co}^{2+}$  ( $1 \times 10^{-3}$  M,  $\text{H}_2\text{O}$ , blue lines).

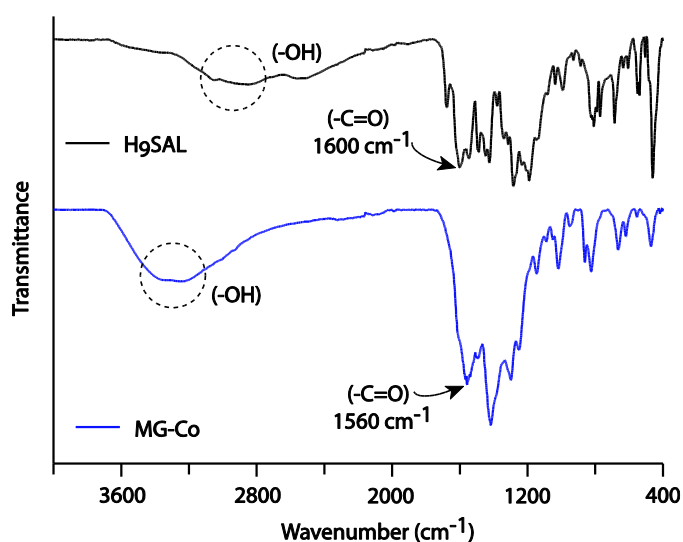

**Figure S5.** FT-IR spectrum of  $\text{H}_9\text{SAL}$  gelator (black) shows  $\nu(\text{-OH})$  at 2876, 3043  $\text{cm}^{-1}$ ,  $\nu(\text{-C=O})$  at 1600, 1680  $\text{cm}^{-1}$ . FT-IR spectrum of  $\text{MG-Co}$  xerogel (blue) shows  $\nu(\text{-OH})$  at 3290  $\text{cm}^{-1}$ ,  $\nu(\text{-C=O})$  at 1555, 1611  $\text{cm}^{-1}$ .

Note: Binding of  $\text{Co}^{2+}$  to the the  $\text{-COOH}$  and  $\text{-OH}$  chelating sites of  $\text{H}_9\text{SAL}$  causes appreciable shift in vibrational bands corresponding to the  $\text{-C=O}$  and  $\text{-OH}$  bonds.

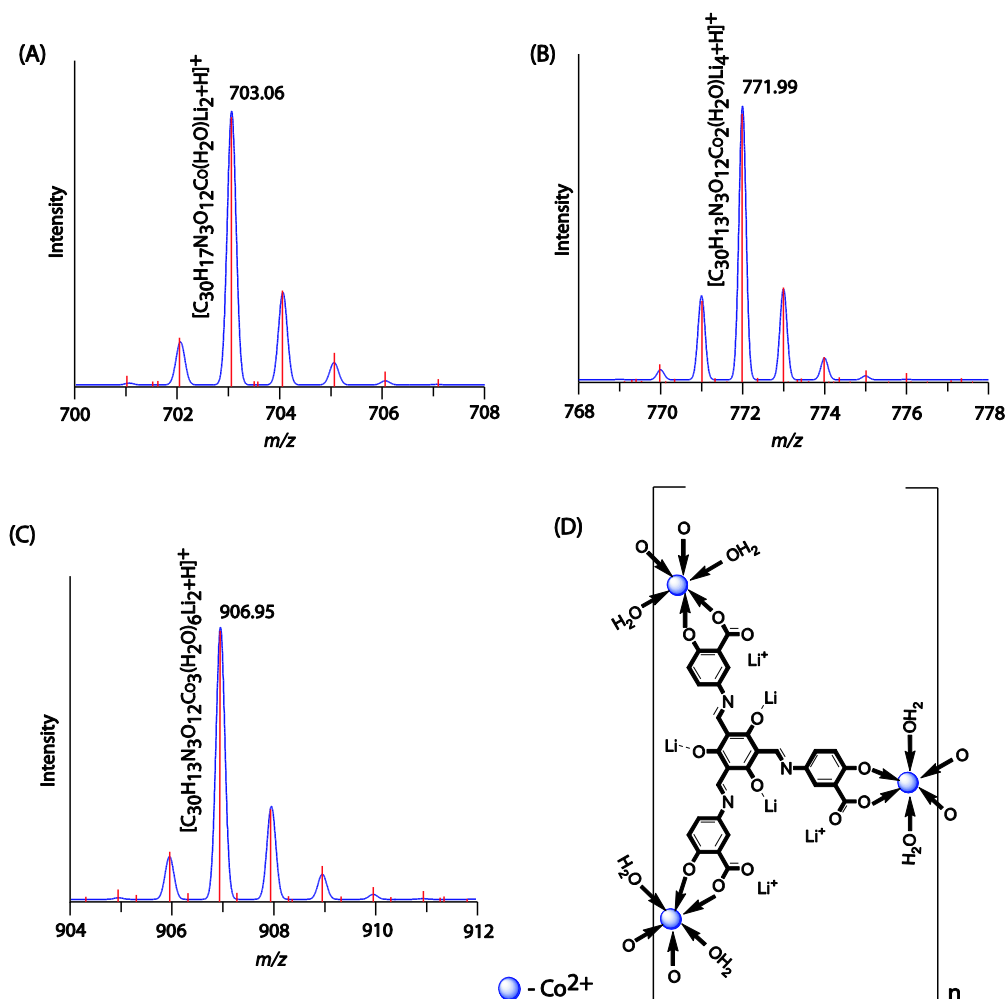

**Figure S6.** (A-C) ESI-MS spectra of diluted **MG-Co**: Isotopic abundance patterns corresponding to the molecular ion species  $[\text{C}_{30}\text{H}_{17}\text{N}_3\text{O}_{12}\text{Co}(\text{H}_2\text{O})\cdot\text{Li}_2+\text{H}]^+$ ,  $[\text{C}_{30}\text{H}_{13}\text{N}_3\text{O}_{12}\text{Co}_2(\text{H}_2\text{O})\cdot\text{Li}_4+\text{H}]^+$  and  $[\text{C}_{30}\text{H}_{13}\text{N}_3\text{O}_{12}\text{Co}_3(\text{H}_2\text{O})_6\cdot\text{Li}_2+\text{H}]^+$ ; (D) Chemical structure of the **MG-Co** confirmed with help of various instrumental techniques.

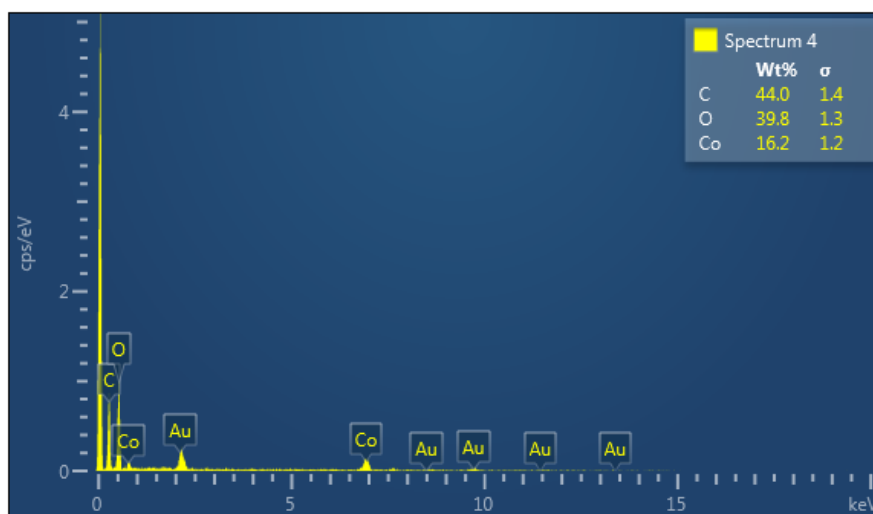

**Figure S7.** (A) EDS spectrum of **MG-Co** xerogel showing presence of C, O and Co elements. Note: The EDS analysis provided the average weight percentage of Co element to be ~ 12.47%.

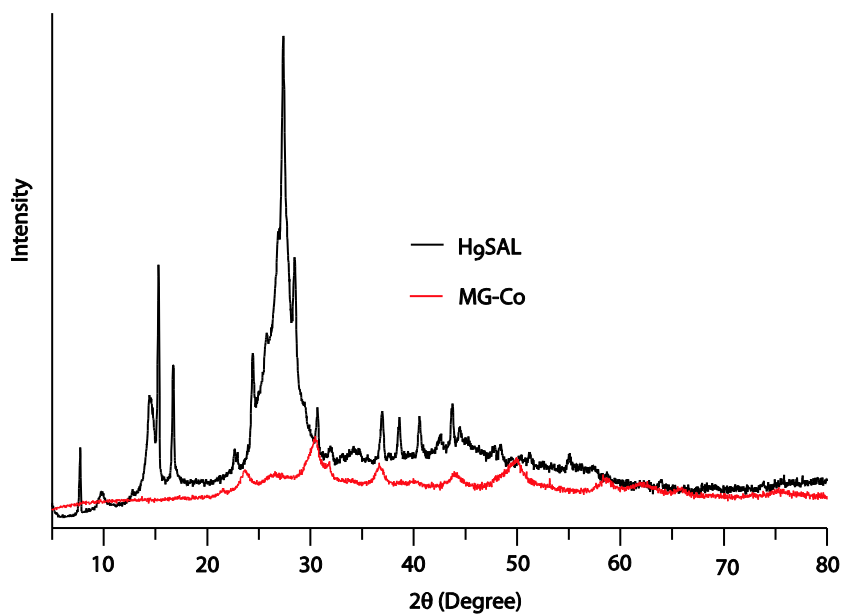

**Figure S8.** Powder XRD patterns of **H<sub>9</sub>SAL** and **MG-Co** xerogel.

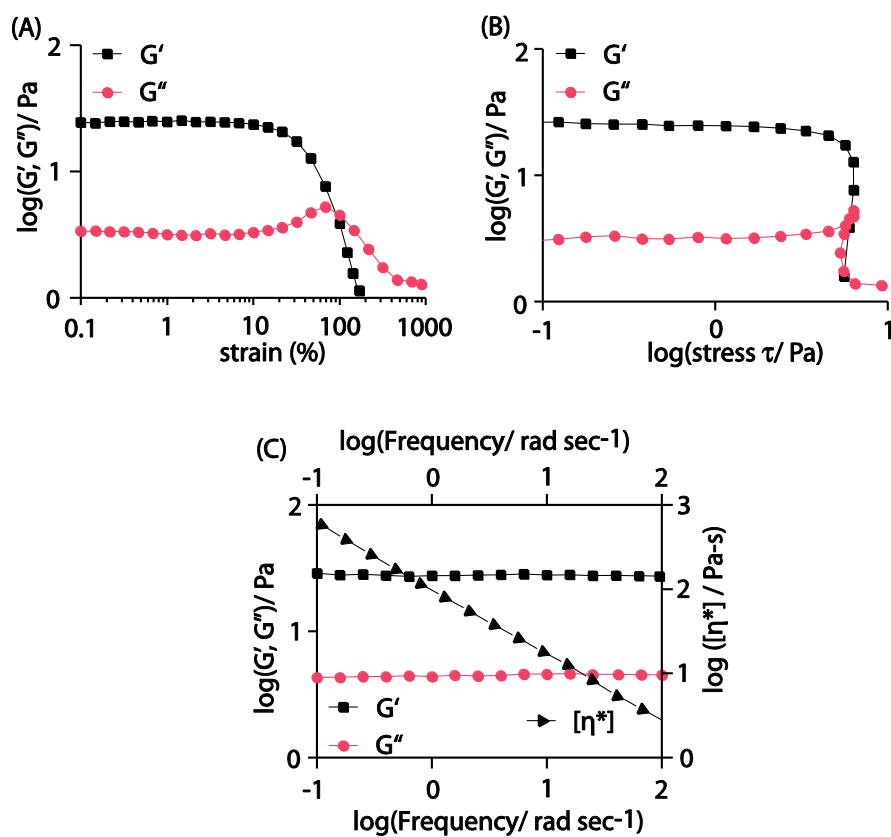

**Figure S9.** Rheological study over freshly prepared **MG-Co** metalhydrogel (A) Variation in  $G'$  and  $G''$  at a frequency of  $10 \text{ rad s}^{-1}$  and  $25^\circ\text{C}$  under strain sweep, (B) Variation in  $G'$  and  $G''$  at a frequency of  $10 \text{ rad s}^{-1}$  and  $25^\circ\text{C}$  under stress sweep, (C) Variation of  $G'$  and  $G''$  against oscillatory frequency.

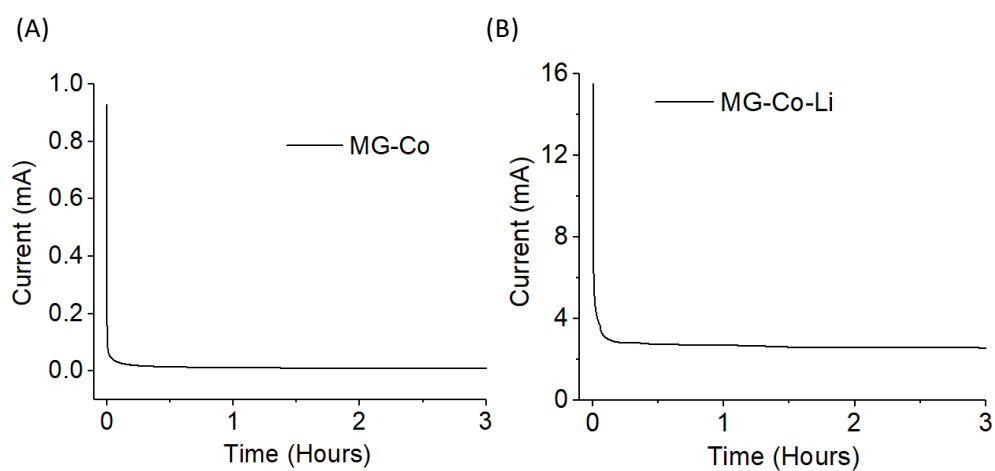

**Figure S10.** D.C. polarization curve of cell: (A) SS|MG-Co|SS and (B) SS|MG-Co-Li|SS, at applied step potential of 0.75 V.

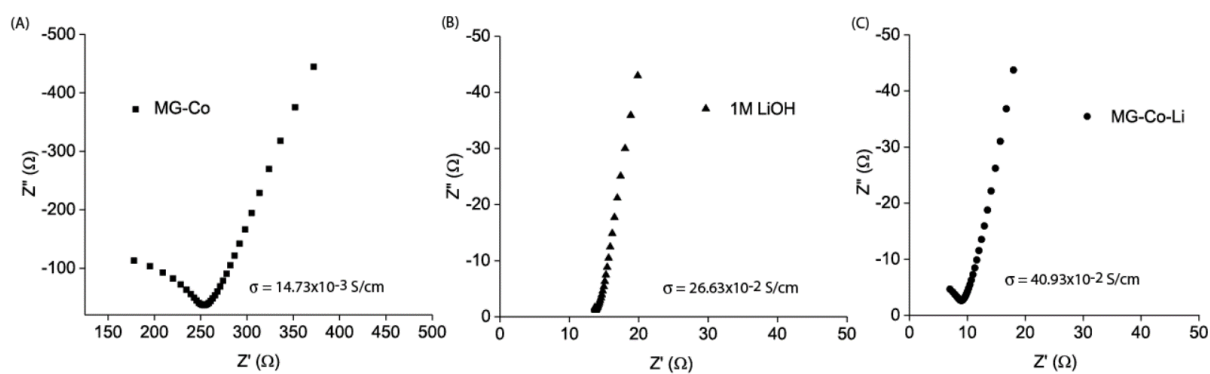

**Figure S11.** Nyquist impedance plots (A) MG-Co, (B) 1M LiOH aqueous solution, (C) MG-Co-Li.

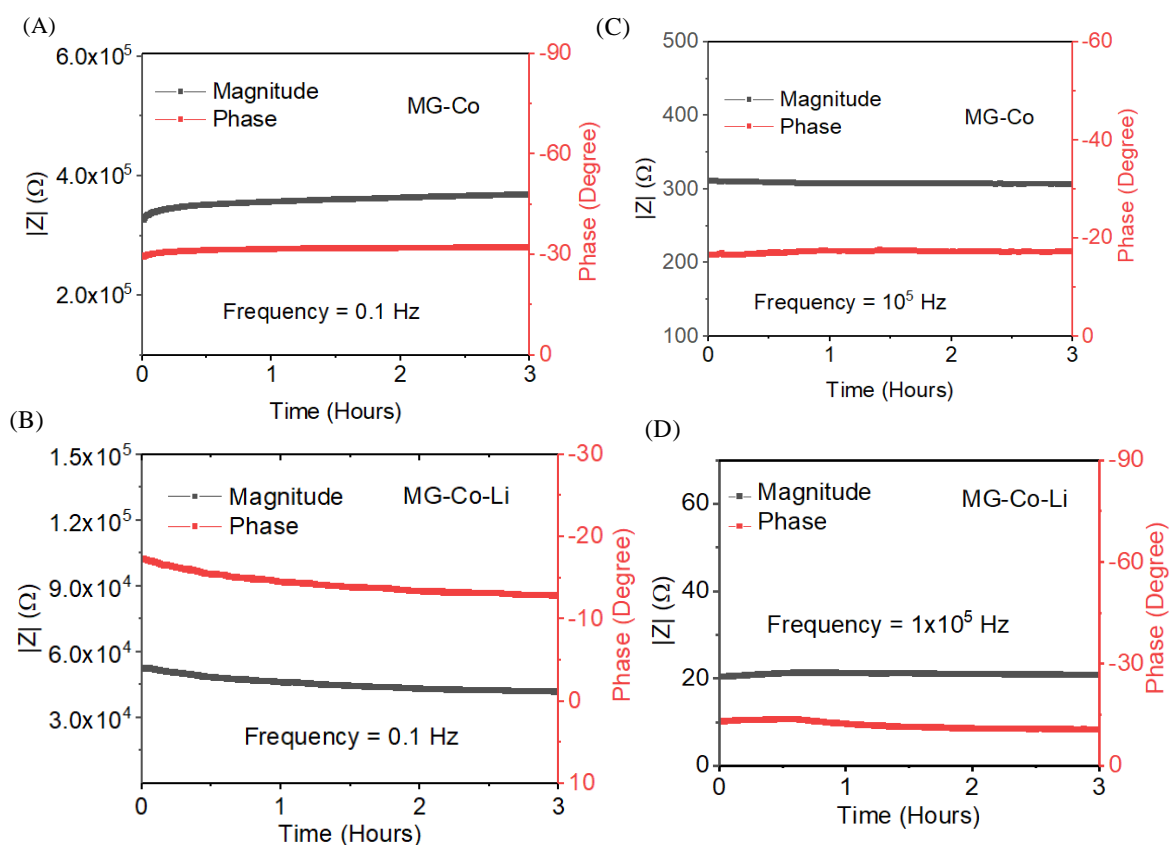

**Figure S12.** (A and B) Impedance variation with time at 0.1 Hz for **MG-Co** and **MG-Co-Li** respectively, (C and D) Impedance variation with time at  $10^5$  Hz for **MG-Co** and **MG-Co-Li** respectively.

**Table S1.** Specific capacitance measured for MG-Co xerogel electrode with 1M LiOH aqueous electrolyte and MG-Co-Li gel electrolyte at various current densities.

| Current densities (A/g) | Specific capacitance (F/g)                               |                                                       |
|-------------------------|----------------------------------------------------------|-------------------------------------------------------|
|                         | MG-Co xerogel electrode with 1M LiOH aqueous electrolyte | MG-Co xerogel electrode with MG-Co-Li gel electrolyte |
| 1                       | 65.5                                                     | 86.0                                                  |
| 1.5                     | 40.8                                                     | 49.2                                                  |
| 2                       | 23.4                                                     | 25.6                                                  |
| 2.5                     | 14.3                                                     | 16.2                                                  |

**Table S2.** Comparison of electrochemical data reported in the current work with previously reported research work.

| Electrolyte                             | Electrode Material | Function                   | Specific capacitance (F/g) | Current density (A/g) | References                                                                              |
|-----------------------------------------|--------------------|----------------------------|----------------------------|-----------------------|-----------------------------------------------------------------------------------------|
| Zinc containing metal-organic gel       | Activated carbon   | Only as electrolyte        | 47.26                      | 1                     | C. K. Karan <i>et al.</i> , <i>Chem. Eur. J.</i> , 2019, <b>25</b> , 14775.             |
| 1M KOH                                  | Sb-COF             | Only as electrode material | 78.6                       | 3                     | K. Kang <i>et al.</i> , <i>Chem. Commun.</i> , 2022, <b>58</b> , 3649.                  |
| 6M KOH                                  | DBT-MA-COF         | Only as electrode material | 90                         | 1                     | L. Li <i>et al.</i> , <i>Microporous Mesoporous Mater.</i> , 2021, <b>312</b> , 110766. |
| H <sub>2</sub> SO <sub>4</sub> /PVA gel | Hex-Aza-COF-3      | Only as electrode material | 64                         | 1                     | S. Kandambeth <i>et al.</i> , <i>Adv. Energy Mater.</i> , 2020, <b>10</b> , 2001673.    |
| 1 M Na <sub>2</sub> SO <sub>4</sub>     | [C60]0.05-COF      | Only as electrode material | 47.6                       | 1                     | X. Zhao, <i>et al.</i> , <i>Carbon</i> , 2021, <b>182</b> , 144.                        |
| H <sub>2</sub> SO <sub>4</sub> /PVA gel | TpOMe-DAQ COF      | Only as electrode material | 84                         | 0.25                  | A. Halder <i>et al.</i> , <i>J. Am. Chem. Soc.</i> , 2018, <b>140</b> , 10941.          |
| 3M KOH                                  | Phos-COF-1         | Only as electrode material | 46                         | 1                     | M. Sajjad <i>et al.</i> , <i>J. Energy Storage</i> , 2021, <b>44</b> , 103318.          |
| 1 M H <sub>2</sub> SO <sub>4</sub>      | FCTF               | Only as electrode material | 173                        | 1                     | Y. Gao <i>et al.</i> , <i>Chem. Eng. J.</i> , 2020, <b>400</b> , 125967.                |

|                 |                                           |                                                   |           |          |                                                                    |
|-----------------|-------------------------------------------|---------------------------------------------------|-----------|----------|--------------------------------------------------------------------|
| 6 M KOH         | N-doped C/g-C <sub>3</sub> N <sub>4</sub> | Only as electrode material                        | 129.3     | 1        | M. Ibrahim <i>et al.</i> , ACS Appl. Energy Mater., 2022, 5, 12828 |
| <b>MG-Co-Li</b> | <b>MG-Co xerogel</b>                      | <b>Both as electrolyte and electrode material</b> | <b>86</b> | <b>1</b> | <b>This work</b>                                                   |

## References

1. V. K. Pandey, M. K. Dixit, S. Manneville, C. Bucher and M. Dubey, *J. Mater. Chem. A*, 2017, **5**, 6211.
2. Y. Kumar and M. Dubey, *Chem. Commun.*, 2022, **58**, 549.
